# Supplementary material
Source: publisher figshare collection journal article supplement (https://gsapubs.figshare.com/ndownloader/files/23301383)
Supplement: Supplementary file 1 [file 23301383]

## Sheet: Table DR1
Supplemental Data Table 1 Ages and compositions of MOR-type (meta)basalts
Locality	Info	Rock type	Age reported	Age used	Unc.	Info	n	SiO2	TiO2	Al2O3	FeO	MnO	MgO	CaO	Na2O
Unit				Ma	Ma			wt%	wt%	wt%	wt%	wt%	wt%	wt%	wt%
Avg MORB	(1)	Basalt with MgO > 8 wt%		0			120	50.1539	1.16122	15.8312	9.51751	na	8.48988	12.0416	2.31719
Orogenic eclogites, amphibolites and granulites
Carolina Terrane, USA	(2)	Amphibolite	550-620 Ma	580	70	(a)	3	49.7667	1.27667	13.5067	11.0831	0.206667	7.22	12.7867	2.26667
Ubende, Tanzania	(3)	Eclogite	1886 and 1866 Ma	1876	20	(a)	12	47.3308	1.11833	13.425	15.3425	0.2425	7.25392	12.7058	1.87083
S margin Dharwar craton, India	(4)	Granulite	2536	2536	300	(b)	3	49.1667	0.5	13.9667	11.5	0.17	11.55	11.4667	0.146667
Central Hebei, North China craton, China	(5)	Granulite and amphibolite	2566	2525	7	(b)	3	47.8	0.836667	14.0133	12.1967	0.193333	8.5	11.4867	2.32667
Kuru-Varaa, Belomorian Belt, Finland	(6)	Eclogite	2870-2720	2821	21	(b)	3	47.06	0.536667	16.1183	10.2732	0.183333	10.915	11.115	1.95
Mantle eclogites
Slave craton, Canada	(7)	Eclogite	2100	2100	300	(b)	3	46.6816	0.756045	15.2568	11.2395	0.208636	13.2952	10.4353	1.78903
Victor, Superior craton, Canada	(8)	Eclogite	2800-2600	2700	200	(c)	8	45.6162	1.23649	16.0715	14.0276	0.294744	8.70656	11.6535	2.46684
Greenland, North Atlantic craton	(9)	Eclogite	2700	2800	300	(b)	4	46.8757	0.603767	15.6987	10.6361	0.256356	14.1628	10.2484	1.77173
Lace, Kaapvaal craton, South Africa	(10)	Eclogite	>2500/2900	3000	100	(b)	11	47.2883	0.688159	15.9334	8.73177	0.176532	13.7721	10.6627	2.05924
Ophiolite complexes
Balkan-Carpathia	(11)	Basalt	563	563	28.15	(b)	4	49.525	1.6475	15.4775	11.52	0.19	7.3175	11.6775	2.71
Monte Orebe, NE Brazil	(12)	Metabasalt	819	819	120	(b)	4	45.9775	0.9575	15.2975	11.6642	0.19	8.6675	11.9275	1.7325
Flin Flon, Trans-Hudson orogen, Canada	(13)	Basalt	1904	1904	4	(b)	4	50.115	1.06	14.73	12.21	0.2075	7.0775	12.4725	1.8375
References (and references cited therein), additional information on method, rock type and event dated:
(1) Jenner and O'Neill 2012: LAM ICPMS, only samples with MgO > 8 wt%, chondrite-normalised Ce/Yb < 1 and no positive Eu-anomalies
(2) Shervais et al. 2003: U-Pb zircon; crystallisation age of associated metadiorite; Paleozoic accretion of the Carolina arc to Laurentia
(3) Boniface et al. 2012: U-Pb zircon; metamorphic age of eclogite; collision of Tanzanian craton and Bangweulu Block
(4) Noack et al. 2013: Lu-Hf whole rock; emplacement age of mafics; subduction-accretion at southern Dharwar craton margin
(5) Guo et al. 2013: U-Pb zircon; minimum crystallisation age of mafics; plate convergence, back-arc basin setting
(6) Shchipansky et al. 2012: U-Pb zircon; magmatic crystallisation age; oceanic crust subduction-formation of Belomorian continental crust
(7) Aulbach et al. 2007; Smart et al. 2014: Lu-Hf whole rock; protolith formation of eclogite; accretion at Slave craton margin
(8) Smit et al. 2014: Re-Os whole rock/U-Pb zircon; protolith formation of eclogite/crystallisation of associated granulite (U-Pb); Superior craton assembly
(9) Tappe et al. 2011: Pb-Pb cpx; metamorphism of eclogite; North Atlantic craton assembly
(10) Aulbach and Viljoen 2015: Pb-Pb cpx/Re-Os sulphide; metamorphism of eclogite/eclogitic diamond formation; Kaapvaal craton amalgamation
(11) Savov et al. 2001: U-Pb zircon; crystallisation age gabbro; Pan-African ocean floor
(12) Caxito et al. 2014: Sm-Nd whole rock; oceanic crust formation age; collision of the São Francisco craton (lower plate) with the Pernambuco-Alagoas block
(13) Stern et al. 1995: U-Pb zircon; crystallisation of syn-volcanic diabase sill and gabbro-peridotite cumulate complex; intra-oceanic basin
(a) Median of reported age range, uncertainty corresponding to difference in age range
(b) Isochron or errorchron with associated uncertainty; 100 Ma to metamorphic ages to account for pre-metamorphic formation of ocean floor
(c) Likely age suggested by the authors

## Sheet: Table DR2
Supplemental Data Table 2 V/Sc and calculation of DFMQ of MOR-type (meta)basalts
Locality1	Age	n	V/Sc2	1s	TP3	Pinitial4	avg F5	DFMQ6	1s7	DFMQ8
Unit	Ma				oC	GPa				P-corr
Avg MORB	0	120	6.8	0.8	1310	1.5215	0.10215	-0.38	0.29	-0.38
Orogenic eclogites, amphibolites and granulites
Carolina Terrane, USA	580	3	7.9	0.5	1314.55	1.55893	0.105893	0.033	0.166	0.0447859
Ubende, Tanzania	1876	12	6.57719	0.436236	1363.46	1.97414	0.147414	-0.413432	0.21	-0.318604
S margin Dharwar craton, India	2536	3	5.1018	0.886234	1396.23	2.26572	0.176572	-1.36293	0.63	-1.20979
Central Hebei, North China craton, China	2525	3	6.6064	0.129797	1397.85	2.28044	0.178044	-0.355673	0.06	-0.199585
Kuru-Varaa, Belomorian Belt, Finland	2821	3	5.0081	0.296628	1412.11	2.41091	0.191091	-1.51435	0.25	-1.33217
Mantle eclogites
Slave craton, Canada	2100	3	5.91015	1.5	1373.95	2.06634	0.156634	-0.77705	0.79	-0.663781
Victor, Superior craton, Canada	2700	8	5.07102	1.00318	1405.24	2.34779	0.184779	-1.40008	0.73	-1.23052
Victor, Superior craton (conservative)			5.51809	0.665676	1405.24	2.34779	0.184779	-1.09116	0.49	-0.921598
Greenland, North Atlantic craton	2800	4	4.96889	0.6	1405.24	2.34779	0.184779	-1.48117	0.46	-1.31161
Lace, Kaapvaal craton, South Africa	3000	11	4.65825	1.22903	1422.62	2.50836	0.200836	-1.88466	1.09	-1.68299
Lace, Kaapvaal craton (conservative)			5.23252	0.869035	1422.62	2.50836	0.200836	-1.36	0.7	-1.15833
Ophiolite complexes
Balkan-Carpathia	563	4	7.3	0.7	1314.92	1.56198	0.106198	-0.179975	-0.247262	-0.167579
Monte Orebe, NE Brazil	819	4	7.21825	0.294663	1322.65	1.62599	0.112599	-0.209958	-0.111897	-0.18476
Flin Flon, Trans-Hudson orogen, Canada	1904	4	6.84796	0.844255	1364.55	1.98369	0.148369	-0.280457	0.38	-0.183718
1For references and more information on samples see Supplemental Data Table 1
2V/Sc for metabasalts with Eu* (chondrite-normalised Eu/(0.5*Sm+0.5*Gd) </= 1.1 and having Ce/Yb </= chondrite (Supplemental Methods); only samples having CaO-MgO relationships consistent with peridotite melting and fractionation of only olivine +/- plagioclase and with with MgO > 5.5 wt% (Supplemental Methods)
3Ambient mantle potential temperatures in oC, applicable to decompression melting beneath ocean ridges calculated from age and mantle TP evolution of Davies (2009)
4Initial melting pressure (GPa) is calculated using the solidus parameterisation of Hirschmann (2000) and TP, which is the hypothetical temperature at the surface and disregards the increase in temperature with depth, amounting to 0.4oC per km, or ~25oC at 2 GPa
5Melt fraction F, assuming melt productivity of 10% per GPa (Walter, 1999) and the difference between Pinitial and final melting pressure. Final melting pressure is assumed to be 0.5 GPa beneath spreading ridges (Herzberg and O'Hara, 1998)
6Oxygen fugacity relative to the Fayalite-Quartz-Magnetite buffer (DFMQ), obtained from the relationship of V/Sc with DFMQ as a function of F (Lee et al., 2005)
7Uncertainty propagated from 1s on V/Sc; this does not include uncertainties related to eclogite xenolith bulk rock reconstruction, estimated at <10% and corresponding to ~1 V/Sc "unit" (Supplemental Methods)
8The convecting mantle becomes more reducing with depth, corresponding to DFMQ of -0.4 per GPa (Stagno et al., 2013). The corrected DFMQ is given for a pressure of 1 GPa, i.e. the assumed average melt extraction pressure for modern MORB (Foley, 2011); it is projected from the average melting pressure, which is (Pinitial-Pfinal)/2, with Pfinal = 0.5 GPa

## Sheet: Table DR3
Supplemental Data Table 3 V/Sc and DFMQ1 averaged for different time intervals
Age	V/Sc	DFMQ1GPa		Age	V/Sc	DFMQ1GPa
Ma		P-corr		Ma		P-corr
All post-Archaean				Archaean, conservative values except 1 outlier
0	6.8	-0.38
563	7.3	-0.167579		2536	5.1018	-1.20979
580	7.9	0.0447859		2700 cons	5.51809	-0.921598
819	7.21825	-0.18476		2800	4.96889	-1.31161
1876	6.57719	-0.318604		2821	5.0081	-1.33217
1904	6.84796	-0.183718		3000 cons	5.23252	-1.15833
2100	5.91015	-0.663781
Avg	6.93622	-0.264808		Avg	5.16588	-1.1867
2s	1.25135	0.442439		2s	0.443051	0.329212
550-800 Ma	Neoproterozoic			1900-2100 Ma	Palaeoproterozoic
563	7.3	-0.167579		1876	6.57719	-0.318604
580	7.9	0.0447859		1904	6.84796	-0.183718
819	7.21825	-0.18476		2100	5.91015	-0.663781
Avg	7.47275	-0.102518		Avg	6.4451	-0.388701
2s	0.744522	0.255715		2s	0.965311	0.495178
1Data from Supplemental Table 2

## Sheet: Table DR4
Supplemental Data Table 4 Modelling of V and Sc for melt extraction from various mantle sources and from rutile eclogite as a function of fO2
Mineral modes			Olivine	Opx	Cpx	Spinel	Garnet	Rutile
PM1 mode sp		Walter (2005)	0.568	0.236	0.17	0.026
PM1 mode gt		Walter (2005)	0.54	0.22	0.06		0.18
DM1 mode		Workman and Hart (2005)	0.57	0.28	0.13	0.02
Hybrid. perid.2		Lambart et al. (2012)	0.495006		0.446171		0.0588235
Rutile eclogite		Aulbach and Viljoen (2015)			0.445		0.55	0.005
			Sc3	V (DFMQ-2)3	V/Sc	V (DFMQ-1)3	V/Sc	V (DFMQ-0.4)3	V/Sc
Reservoirs
Pyrolite1		McDonough and Sun (1995)	16.2	82±12
DM		Salters and Stracke (2004)	16.3	79±6
NMORB		Gale et al. (2013)	38.4	280
Distribution coefficients
olivine/melt		Mallmann and O'Neill (2009)	0.135	0.199618	1.47865	0.093562	0.693052	0.0442385	0.327692
opx/melt		Mallmann and O'Neill (2009)	0.352	0.198061	0.562675	0.0936268	0.265985	0.0445451	0.126549
cpx/melt		Mallmann and O'Neill (2009)	1.51	2.13944	1.41685	1.13632	0.752528	0.572928	0.379422
spinel/melt		Mallmann and O'Neill (2009)	0.058	13.0798	225.514	6.76277	116.599	3.1722	54.6931
garnet/melt		Mallmann and O'Neill (2009)	5.98	2.13944	0.357766	1.13632	0.19002	0.572928	0.0958073
rutile/melt		Foley et al. (2000) exp. 42		118		81.6923		54.4615
Bulk D sp PM4			0.41796	0.863905	2.06696	0.444245	1.06289	0.289859	0.693508
Bulk D gt PM4			1.31734	0.664833	0.504678	0.343838	0.261009	0.227344	0.172578
Bulk D DM4			0.37297	0.708962	1.90086	0.362523	0.971989	0.236219	0.633347
Bulk D Hybrid.			1.09231	1.17922	1.07956	0.620148	0.567741	0.412394	0.377543
Bulk D Rut. ecl.			3.7171	2.71874	0.731415	1.5391	0.414059	1.0267	0.276209
Batch melting of PM
Melt	F=	0.03	37.2054	94.4714	2.53919	177.906	4.78173	263.527	7.08305
Melt	F=	0.1	34.0219	93.4458	2.74664	164.059	4.82215	227.227	6.67884
Melt	F=	0.2	28.7504	91.3213	3.17635	140.607	4.89062	175.441	6.1022
Melt	F=	0.3	27.3385	90.6344	3.31527	134.212	4.90929	163.054	5.96427
Residue5	F=	0.03	15.5503	80.3755	5.16872	78.8989	5.07377	77.341	4.97358
Residue	F=	0.1	14.2198	76.8241	5.40262	72.5011	5.0986	68.2877	4.8023
Residue	F=	0.2	12.671	72.2628	5.70303	64.9744	5.12782	58.5045	4.61721
Residue	F=	0.3	11.4264	68.2129	5.96977	58.8635	5.15155	51.1731	4.47851
Batch melting of rutile eclogite
Residue	F=	0.05	39.8567	289.139	7.25447	284.991	7.15039	280.365	7.03431
Residue	F=	0.1	41.4283	298.896	7.21477	290.164	7.00399	280.73	6.77629
Residue	F=	0.2	44.9751	320.526	7.12675	301.093	6.69465	281.464	6.25821
Residue	F=	0.3	49.1861	345.532	7.02499	312.877	6.36109	282.201	5.73742
1Mineral modes (wt%) for primitive mantle (PM) in the spinel (sp) and garnet (gt) stability field and depleted mantle (DM); pyrolite is a primitive mantle model; extraction of continental crust (CC) from the PM is thought to have led to formation of the DM (e.g. Workman and Hart, 2005); at least 50% of the CC formed in the Archaean (Belousova et al., 2010)
2Hybridised peridotite, formed experimentally by reacting eclogite-derived melt with peridotite
3V distribution coefficients for different fO2 were parameterised from Mallmann and O'Neill (2009); the average value for Cr-spinel and Al-spinel was employed, and identical values used for cpx and garnet; except as follows: spinelDSc was taken from Davis et al. (2013) and garnet+cpx DSc for eclogite melting from Barth et al. (2002); rutileDV at DFMQ-2 was taken from experiment #42 of Foley et al…
4The primitive and depleted mantle have subtly different mineral modes, but similar BulkDV/Sc, hence the secular evolution of mineral modes of the convecting mantle cannot explain the increase of V/Sc in spreading ridge-derived melts with time
5Extraction of 3% partial melt from the PM can explain the modern DM composition (Workman and Hart, 2005); the average fO2 that can explain the decrease in V concentration from 82 ppm in the PM to 79 ppm in the DM corresponds to DFMQ-1, i.e. higher than modern convecting mantle (DFMQ-0.4), and requires a change in uppermost mantle redox state
